# Supplementary material for: Die Gesundheitsversorgung älterer türkeistämmiger Pendelmigrant*innen: qualitative Interviewstudie
Source: Springer Nature journal article supplement (doi:10.1007/s44266-023-00096-2), 2023-08-09
Supplement: MOESM1 [file 25904220]

**Tab. e2: Kategoriensystem - Qualitative Analyse**

| <b>Interviews Pendelmigrant*innen</b>                                      |                                                                                                                                                                                                                                                                                                                                                                                            |
|----------------------------------------------------------------------------|--------------------------------------------------------------------------------------------------------------------------------------------------------------------------------------------------------------------------------------------------------------------------------------------------------------------------------------------------------------------------------------------|
| <b>Oberkategorie</b>                                                       | <b>Unterkategorien</b>                                                                                                                                                                                                                                                                                                                                                                     |
| Kontextinformationen                                                       | Migrationszeitpunkt; Migrationsanlass; Beginn langen Pendelns; Änderungen beim Pendeln; Pendeldauer; Pendelzeitraum; Pendelbegleitung; Aufenthaltsort                                                                                                                                                                                                                                      |
| Gesundheitszustand                                                         | Gesundheitszustand allgemein; Krankheiten; Krankheitsverständnis <sup>1</sup> ; Vergleich Gesundheitszustand in Deutschland und der Türkei; Pflegegrad und Grad der Behinderung                                                                                                                                                                                                            |
| Versorgungssituation                                                       | Versorgungssituation in Deutschland allgemein; Vergleich der Versorgungssituation in Deutschland und der Türkei; Barrieren in der Versorgung                                                                                                                                                                                                                                               |
| Medikation                                                                 | Medikation allgemein; Verschreibung, Erhalt und Erwerb von Medikamenten <sup>1</sup> ; Strategien, um transnational an Medikamente zu gelangen; Einnahme (Dis-/Kontinuität) <sup>1</sup> ; Barrieren in der Medikation; Zufriedenheit                                                                                                                                                      |
| Bedürfnisse und Erwartungen                                                | Bedürfnisse und Erwartungen allgemein; Allgemeine Herausforderungen und Barrieren und Ressourcen <sup>1</sup>                                                                                                                                                                                                                                                                              |
| Verbesserungsvorschläge                                                    | Verbesserungsvorschläge allgemein                                                                                                                                                                                                                                                                                                                                                          |
| <b>Interviews Gesundheitsversorger*innen</b>                               |                                                                                                                                                                                                                                                                                                                                                                                            |
| <b>Oberkategorie</b>                                                       | <b>Unterkategorien</b>                                                                                                                                                                                                                                                                                                                                                                     |
| Kontextinformationen zur Behandlung älterer, türkeistämmiger Patient*innen | Anzahl Patient*innen aus Zielgruppe; Anzahl der pendelnden Patient*innen; Verweildauer in der Türkei/Pendelzeitraum <sup>1</sup> ; Kontextinformationen allgemein                                                                                                                                                                                                                          |
| Gesundheitszustand der Pendelmigrant*innen                                 | Häufige Erkrankungen; Wahrgenommene Zusammenhänge zwischen Pendeln und Gesundheitszustand; Vergleich des Gesundheitszustands                                                                                                                                                                                                                                                               |
| Versorgungssituation                                                       | Versorgungssituation allgemein; Kommunikation mit der Patient*innengruppe in Bezug auf das Pendeln; Wissen über Gesundheitsversorgung in der Türkei <sup>1</sup> ; Inter-/intraprofessionelle Kommunikation transnational <sup>1</sup> ; Barrieren und Ressourcen in der Versorgung der Zielgruppe beim Pendeln; Barrieren und Ressourcen bei der Versorgung türkeistämmiger Patient*innen |
| Medikation                                                                 | Medikation allgemein; (Dis-)Kontinuitäten in der Einnahme allgemein; Veränderungen Medikation durch das Pendeln; Barrieren und Ressourcen in der transnationalen med. Versorgung; Verschreibung/Erhalt der Medikamente in Deutschland und der Türkei <sup>1</sup>                                                                                                                          |
| Zufriedenheit                                                              | Patient*innenzufriedenheit und –wünsche; Eigene Zufriedenheit mit der Arbeitssituation <sup>1</sup> ; Zufriedenheit mit der medikamentösen Versorgung                                                                                                                                                                                                                                      |
| Verbesserungsvorschläge                                                    | Verbesserungsvorschläge bzgl. der Versorgung der Zielgruppe; Verbesserungsvorschläge in Bezug auf das Gesundheitssystem <sup>1</sup> ; Professionsbezogene Verbesserungsvorschläge <sup>1</sup>                                                                                                                                                                                            |

<sup>1</sup> Kategorie induktiv am Material entwickelt
